# Supplementary material
Source: publisher site journal article supplement (http://content.karger.com/ProdukteDB/miscArchiv/000/210/448/Suppl.Material.pdf)
Supplement: Supplementary file 1 [file Suppl.Material.pdf]

**Supplementary table**

Raw data for Oma.

| <b>Sample</b> | <b>DYS19</b> | <b>DYS389I</b> | <b>DYS389II</b> | <b>DYS390</b> | <b>DYS391</b> | <b>DYS392</b> | <b>DYS393</b> | <b>DYS385</b> | <b>DYS439</b> | <b>DYS438</b> |
|---------------|--------------|----------------|-----------------|---------------|---------------|---------------|---------------|---------------|---------------|---------------|
| OMA1          | 14           | 13             | 31              | 21            | 10            | 11            | 13            | 16,18         | 10            | 12            |
| OMA2          | 14           | 13             | 30              | 23            | 10            | 11            | 12            | 14,18         | 11            | 10            |
| OMA3          | 14           | 13             | 32              | 23            | 10            | 11            | 13            | 13,16         | 11            | 9             |
| OMA4          | 14           | 13             | 30              | 24            | 10            | 11            | 13            | 17,18         | 12            | 10            |
| OMA5          | 14           | 12             | 28              | 24            | 12            | 11            | 13            | 14,19         | 11            | 11            |
| OMA6          | 15           | 13             | 30              | 24            | 10            | 11            | 13            | 14,16         | 12            | 10            |
| OMA7          | 16           | 13             | 30              | 22            | 10            | 11            | 15            | 17,18         | 12            | 11            |
| OMA8          | 13           | 13             | 31              | 25            | 9             | 11            | 13            | 16,17         | 11            | 10            |
| OMA9          | 15           | 13             | 29              | 24            | 10            | 11            | 12            | 13,18         | 12            | 9             |
| OMA10         | 15           | 13             | 31              | 24            | 10            | 11            | 13            | 15,16         | 12            | 10            |
| OMA11         | 16           | 12             | 30              | 21            | 10            | 11            | 14            | 15,17         | 13            | 11            |
| OMA12         | 14           | 13             | 30              | 23            | 11            | 11            | 12            | 16,16         | 11            | 10            |
| OMA13         | 14           | 12             | 30              | 23            | 10            | 11            | 12            | 13,17         | 11            | 10            |
| OMA14         | 15           | 12             | 26              | 23            | 10            | 11            | 14            | 19,20         | 11            | 10            |
| OMA15         | 14           | 13             | 30              | 23            | 10            | 11            | 12            | 13,18         | 11            | 10            |
| OMA16         | 14           | 13             | 29              | 24            | 10            | 11            | 9             | 18,19         | 12            | 10            |
| OMA17         | 14           | 13             | 29              | 24            | 10            | 11            | 9             | 18,18         | 13            | 10            |
| OMA18         | 14           | 13             | 30              | 22            | 10            | 11            | 12            | 14,15         | 11            | 9             |
| OMA19         | 15           | 13             | 30              | 21            | 11            | 11            | 14            | 15,16         | 12            | 11            |
| OMA20         | 14           | 13             | 30              | 23            | 11            | 11            | 12            | 13,19         | 11            | 10            |
| OMA21         | 14           | 13             | 29              | 23            | 9             | 10            | 13            | 15,22         | 12            | 9             |
| OMA22         | 14           | 13             | 30              | 23            | 10            | 11            | 12            | 13,18         | 11            | 10            |
| OMA23         | 15           | 14             | 32              | 24            | 10            | 11            | 13            | 11,11         | 12            | 10            |
| OMA24         | 14           | 13             | 31              | 23            | 11            | 11            | 12            | 13,13         | 11            | 10            |
| OMA25         | 14           | 13             | 30              | 23            | 11            | 11            | 12            | 13,18         | 11            | 10            |
| OMA26         | 14           | 13             | 28              | 24            | 12            | 14            | 12            | 11,14         | 12            | 12            |
| OMA27         | 14           | 13             | 31              | 23            | 11            | 11            | 12            | 13,18         | 11            | 10            |

|       |    |    |    |    |    |    |    |       |    |    |
|-------|----|----|----|----|----|----|----|-------|----|----|
| OMA28 | 15 | 13 | 30 | 24 | 10 | 11 | 13 | 14,17 | 12 | 10 |
| OMA30 | 16 | 13 | 30 | 25 | 11 | 11 | 13 | 12,14 | 10 | 11 |
| OMA31 | 14 | 12 | 28 | 24 | 10 | 11 | 13 | 13,18 | 12 | 9  |
| OMA32 | 17 | 13 | 30 | 21 | 11 | 11 | 14 | 16,17 | 12 | 11 |
| OMA33 | 13 | 13 | 30 | 24 | 10 | 11 | 12 | 17,18 | 12 | 11 |
| OMA34 | 15 | 13 | 31 | 21 | 10 | 11 | 13 | 15,16 | 13 | 11 |
| OMA35 | 16 | 13 | 30 | 24 | 11 | 11 | 13 | 11,14 | 10 | 11 |
| OMA36 | 15 | 13 | 30 | 25 | 11 | 11 | 13 | 11,14 | 10 | 11 |
| OMA37 | 14 | 13 | 31 | 24 | 10 | 11 | 13 | 17,17 | 12 | 10 |
| OMA38 | 14 | 13 | 31 | 23 | 10 | 11 | 12 | 13,17 | 11 | 10 |
| OMA39 | 14 | 13 | 31 | 23 | 10 | 11 | 12 | 13,19 | 11 | 10 |
| OMA40 | 14 | 13 | 29 | 24 | 11 | 11 | 13 | 11,14 | 11 | 10 |
| OMA41 | 15 | 15 | 33 | 21 | 10 | 11 | 13 | 17,18 | 11 | 11 |
| OMA42 | 15 | 13 | 31 | 21 | 10 | 11 | 13 | 17,19 | 11 | 11 |
| OMA43 | 14 | 13 | 29 | 23 | 10 | 11 | 13 | 12,14 | 11 | 9  |
| OMA44 | 14 | 13 | 30 | 24 | 10 | 11 | 13 | 17,18 | 12 | 10 |
| OMA45 | 14 | 13 | 29 | 24 | 10 | 11 | 9  | 18,18 | 12 | 10 |
| OMA46 | 15 | 14 | 31 | 23 | 10 | 11 | 13 | 18,18 | 10 | 10 |
| OMA47 | 14 | 13 | 31 | 24 | 10 | 11 | 12 | 16,17 | 12 | 10 |
| OMA49 | 14 | 13 | 29 | 24 | 10 | 13 | 13 | 16,16 | 11 | 9  |
| OMA50 | 15 | 13 | 30 | 23 | 10 | 12 | 13 | 14,16 | 10 | 9  |
| OMA51 | 14 | 13 | 31 | 23 | 10 | 11 | 12 | 13,17 | 11 | 10 |
| OMA52 | 15 | 13 | 29 | 24 | 10 | 11 | 12 | 13,19 | 14 | 9  |
| OMA53 | 13 | 13 | 32 | 24 | 10 | 11 | 12 | 16,18 | 12 | 10 |
| OMA54 | 16 | 13 | 30 | 24 | 11 | 11 | 13 | 12,14 | 10 | 11 |
| OMA55 | 15 | 12 | 30 | 25 | 11 | 11 | 13 | 11,14 | 10 | 11 |
| OMA56 | 14 | 13 | 30 | 24 | 10 | 11 | 12 | 13,18 | 11 | 10 |
| OMA57 | 15 | 13 | 30 | 23 | 10 | 11 | 12 | 13,18 | 12 | 10 |
| OMA58 | 15 | 13 | 30 | 24 | 10 | 11 | 13 | 15,16 | 11 | 10 |
| OMA59 | 14 | 13 | 28 | 23 | 10 | 11 | 12 | 20,22 | 11 | 9  |
| OMA60 | 14 | 13 | 29 | 23 | 10 | 11 | 12 | 12,16 | 12 | 10 |
| OMA61 | 14 | 12 | 28 | 22 | 10 | 14 | 11 | 13,15 | 12 | 10 |

|        |    |    |    |    |    |    |    |       |    |    |
|--------|----|----|----|----|----|----|----|-------|----|----|
| OMA67  | 14 | 12 | 28 | 25 | 11 | 11 | 13 | 15,19 | 12 | 11 |
| OMA68  | 15 | 13 | 31 | 25 | 11 | 11 | 13 | 11,14 | 10 | 11 |
| OMA69  | 14 | 13 | 28 | 23 | 11 | 11 | 13 | 10,14 | 12 | 11 |
| OMA70  | 16 | 12 | 28 | 23 | 10 | 11 | 12 | 12,18 | 12 | 10 |
| OMA71  | 13 | 13 | 31 | 24 | 10 | 11 | 12 | 16,16 | 12 | 10 |
| OMA74  | 14 | 13 | 30 | 23 | 10 | 11 | 12 | 13,17 | 11 | 10 |
| OMA76  | 13 | 13 | 31 | 24 | 10 | 11 | 12 | 16,17 | 12 | 10 |
| OMA83  | 14 | 14 | 30 | 23 | 10 | 11 | 13 | 14,17 | 12 | 9  |
| OMA86  | 15 | 13 | 30 | 24 | 11 | 11 | 13 | 12,14 | 10 | 11 |
| OMA95  | 14 | 13 | 29 | 24 | 10 | 11 | 12 | 12,19 | 12 | 10 |
| OMA96  | 14 | 14 | 30 | 24 | 10 | 11 | 12 | 12,20 | 12 | 10 |
| OMA97  | 14 | 13 | 30 | 23 | 11 | 11 | 12 | 13,19 | 11 | 10 |
| OMA98  | 15 | 12 | 28 | 23 | 10 | 10 | 14 | 13,18 | 13 | 11 |
| OMA99  | 13 | 13 | 32 | 24 | 10 | 11 | 12 | 16,17 | 12 | 10 |
| OMA100 | 16 | 12 | 28 | 24 | 9  | 11 | 12 | 16,20 | 13 | 9  |
| OMA101 | 14 | 13 | 30 | 24 | 10 | 11 | 12 | 14,17 | 12 | 10 |
| OMA102 | 13 | 13 | 32 | 24 | 10 | 11 | 12 | 17,18 | 12 | 10 |
| OMA104 | 15 | 13 | 30 | 24 | 10 | 11 | 13 | 15,16 | 11 | 10 |
| OMA105 | 16 | 13 | 30 | 23 | 10 | 11 | 12 | 15,16 | 12 | 9  |
| OMA106 | 14 | 13 | 28 | 25 | 11 | 14 | 12 | 11,14 | 12 | 12 |
| OMA108 | 14 | 13 | 27 | 23 | 10 | 11 | 13 | 13,16 | 12 | 9  |
| OMA110 | 16 | 13 | 31 | 25 | 10 | 11 | 13 | 12,12 | 10 | 11 |
| OMA111 | 16 | 14 | 29 | 24 | 10 | 13 | 13 | 11,13 | 11 | 11 |
| OMA112 | 15 | 13 | 32 | 24 | 10 | 11 | 13 | 11,14 | 10 | 11 |
| OMA113 | 17 | 13 | 29 | 27 | 11 | 11 | 13 | 11,11 | 10 | 11 |
| OMA114 | 14 | 14 | 30 | 23 | 10 | 11 | 14 | 17,18 | 12 | 10 |
| OMA116 | 14 | 13 | 29 | 23 | 10 | 11 | 13 | 13,18 | 11 | 10 |
| OMA117 | 14 | 13 | 29 | 23 | 10 | 11 | 13 | 13,18 | 11 | 10 |
| OMA118 | 15 | 13 | 29 | 24 | 10 | 11 | 12 | 13,19 | 13 | 9  |
| OMA119 | 15 | 13 | 30 | 24 | 10 | 11 | 13 | 14,16 | 12 | 10 |
| OMA120 | 16 | 13 | 30 | 21 | 10 | 11 | 14 | 17,19 | 11 | 11 |
| OMA121 | 13 | 13 | 31 | 24 | 10 | 11 | 13 | 16,20 | 13 | 10 |

|        |    |    |    |    |    |    |    |       |    |    |
|--------|----|----|----|----|----|----|----|-------|----|----|
| OMA123 | 16 | 13 | 30 | 25 | 11 | 11 | 13 | 11,14 | 10 | 11 |
| OMA124 | 14 | 14 | 31 | 22 | 10 | 13 | 13 | 14,16 | 11 | 9  |
| OMA125 | 15 | 13 | 30 | 21 | 10 | 11 | 13 | 14,18 | 13 | 11 |
| OMA126 | 15 | 12 | 28 | 22 | 10 | 14 | 11 | 13,17 | 14 | 10 |
| OMA127 | 14 | 13 | 30 | 24 | 10 | 11 | 12 | 14,18 | 11 | 10 |
| OMA129 | 15 | 13 | 30 | 23 | 10 | 11 | 12 | 14,20 | 13 | 9  |
| OMA130 | 14 | 13 | 30 | 23 | 11 | 11 | 12 | 13,18 | 12 | 10 |
| OMA131 | 15 | 13 | 30 | 23 | 10 | 11 | 12 | 15,19 | 11 | 10 |

Raw data for Saudi Arabia.

| <b>Sample #</b> | <b>DYS19</b> | <b>DYS389I</b> | <b>DYS389II</b> | <b>DYS390</b> | <b>DYS391</b> | <b>DYS392</b> | <b>DYS393</b> | <b>DYS385</b> | <b>DYS439</b> | <b>DYS438</b> |
|-----------------|--------------|----------------|-----------------|---------------|---------------|---------------|---------------|---------------|---------------|---------------|
| SAU1            | 14           | 13             | 29              | 23            | 11            | 11            | 12            | 13,18         | 11            | 10            |
| SAU2            | 14           | 13             | 29              | 23            | 10            | 11            | 14            | 14,17         | 11            | 9             |
| SAU3            | 14           | 12             | 28              | 23            | 11            | 11            | 12            | 13,17         | 11            | 9             |
| SAU4            | 14           | 13             | 29              | 23            | 11            | 11            | 10            | 13,19         | 11            | 10            |
| SAU5            | 14           | 13             | 30              | 23            | 11            | 11            | 12            | 13,18         | 11            | 10            |
| SAU6            | 14           | 13             | 30              | 23            | 11            | 11            | 12            | 13,18         | 11            | 10            |
| SAU7            | 14           | 13             | 30              | 23            | 10            | 11            | 12            | 13,18         | 11            | 10            |
| SAU8            | 14           | 12             | 29              | 23            | 11            | 11            | 12            | 13,19         | 13            | 10            |
| SAU9            | 14           | 13             | 30              | 23            | 11            | 11            | 12            | 13,19         | 11            | 10            |
| SAU10           | 14           | 13             | 30              | 23            | 11            | 11            | 12            | 13,19         | 11            | 10            |
| SAU11           | 14           | 12             | 30              | 23            | 10            | 12            | 13            | 14            | 11            | 10            |
| SAU12           | 14           | 13             | 30              | 23            | 11            | 11            | 12            | 13,18         | 11            | 10            |
| SAU13           | 15           | 13             | 30              | 22            | 10            | 11            | 12            | 13,19         | 11            | 10            |
| SAU14           | 14           | 13             | 29              | 23            | 11            | 11            | 12            | 13,19         | 11            | 10            |
| SAU15           | 14           | 13             | 30              | 23            | 11            | 11            | 12            | 13,18         | 11            | 10            |
| SAU16           | 14           | 13             | 30              | 22            | 11            | 11            | 12            | 13,18         | 11            | 10            |
| SAU17           | 14           | 14             | 30              | 24            | 10            | 11            | 12            | 13,19         | 12            | 10            |
| SAU18           | 14           | 14             | 31              | 23            | 11            | 11            | 12            | 13,19         | 11            | 10            |
| SAU19           | 14           | 14             | 31              | 23            | 11            | 11            | 12            | 13,18         | 11            | 10            |

|       |    |    |    |    |    |    |    |       |    |    |
|-------|----|----|----|----|----|----|----|-------|----|----|
| SAU20 | 14 | 15 | 31 | 23 | 10 | 11 | 13 | 13,17 | 11 | 10 |
| SAU21 | 14 | 13 | 30 | 23 | 11 | 11 | 12 | 13,20 | 11 | 10 |
| SAU22 | 14 | 13 | 30 | 23 | 11 | 11 | 12 | 13,21 | 12 | 10 |
| SAU23 | 14 | 13 | 30 | 23 | 12 | 11 | 12 | 14,19 | 11 | 10 |
| SAU24 | 14 | 13 | 30 | 23 | 11 | 11 | 12 | 13,19 | 11 | 10 |
| SAU25 | 14 | 13 | 31 | 24 | 10 | 14 | 13 | 14,16 | 12 | 11 |
| SAU26 | 11 | 13 | 32 | 24 | 10 | 12 | 13 | 16,19 | 11 | 12 |
| SAU27 | 15 | 13 | 30 | 23 | 11 | 11 | 12 | 13    | 13 | 10 |
| SAU28 | 14 | 13 | 29 | 24 | 11 | 13 | 12 | 11,13 | 13 | 12 |
| SAU29 | 15 | 14 | 31 | 22 | 10 | 10 | 15 | 13,18 | 12 | 11 |
| SAU30 | 14 | 13 | 30 | 23 | 11 | 11 | 12 | 13,20 | 12 | 10 |
| SAU31 | 14 | 13 | 30 | 24 | 11 | 11 | 12 | 13,17 | 11 | 10 |
| SAU32 | 14 | 13 | 29 | 23 | 11 | 11 | 12 | 13,17 | 11 | 10 |
| SAU33 | 14 | 13 | 30 | 23 | 12 | 11 | 12 | 13,19 | 11 | 10 |
| SAU34 | 15 | 13 | 30 | 21 | 10 | 11 | 15 | 17,18 | 11 | 11 |
| SAU35 | 14 | 13 | 29 | 22 | 9  | 11 | 12 | 13,16 | 11 | 9  |
| SAU36 | 11 | 13 | 30 | 24 | 10 | 13 | 13 | 16,18 | 11 | 11 |
| SAU37 | 15 | 14 | 30 | 23 | 10 | 11 | 12 | 12,19 | 12 | 10 |
| SAU38 | 14 | 13 | 31 | 23 | 11 | 11 | 12 | 13,19 | 11 | 10 |
| SAU39 | 14 | 14 | 30 | 23 | 11 | 13 | 13 | 11,14 | 13 | 12 |
| SAU40 | 14 | 13 | 30 | 23 | 10 | 11 | 12 | 13,17 | 11 | 10 |
| SAU41 | 11 | 13 | 30 | 24 | 10 | 12 | 13 | 16,19 | 12 | 11 |
| SAU42 | 13 | 13 | 31 | 24 | 10 | 14 | 13 | 16,17 | 14 | 10 |
| SAU43 | 14 | 13 | 30 | 23 | 12 | 11 | 12 | 13,19 | 11 | 10 |
| SAU44 | 15 | 13 | 30 | 22 | 10 | 11 | 12 | 13,19 | 12 | 10 |
| SAU45 | 14 | 13 | 29 | 23 | 10 | 11 | 12 | 13,16 | 11 | 9  |
| SAU46 | 14 | 13 | 29 | 23 | 11 | 11 | 12 | 14,17 | 11 | 10 |
| SAU47 | 14 | 13 | 30 | 23 | 11 | 11 | 12 | 12,19 | 11 | 10 |
| SAU48 | 13 | 14 | 30 | 23 | 10 | 11 | 14 | 16    | 12 | 10 |
| SAU49 | 14 | 13 | 29 | 23 | 11 | 11 | 12 | 13,18 | 11 | 10 |
| SAU50 | 15 | 13 | 30 | 23 | 11 | 11 | 12 | 12,18 | 12 | 10 |
| SAU52 | 14 | 13 | 29 | 23 | 12 | 11 | 12 | 13,17 | 11 | 10 |

|       |    |    |    |    |    |    |    |       |    |    |
|-------|----|----|----|----|----|----|----|-------|----|----|
| SAU53 | 13 | 14 | 29 | 23 | 10 | 13 | 15 | 16,17 | 9  | 9  |
| SAU54 | 14 | 13 | 29 | 23 | 11 | 11 | 12 | 13,18 | 11 | 10 |
| SAU55 | 15 | 13 | 30 | 21 | 10 | 11 | 15 | 18    | 12 | 11 |
| SAU56 | 14 | 13 | 29 | 25 | 10 | 11 | 12 | 18    | 12 | 10 |
| SAU58 | 15 | 12 | 27 | 24 | 10 | 14 | 13 | 14,16 | 11 | 9  |
| SAU61 | 14 | 13 | 30 | 23 | 11 | 11 | 12 | 13,18 | 11 | 10 |
| SAU62 | 10 | 13 | 30 | 24 | 10 | 12 | 12 | 16,17 | 11 | 11 |
| SAU63 | 15 | 13 | 29 | 24 | 10 | 11 | 12 | 13,18 | 11 | 9  |
| SAU64 | 14 | 13 | 29 | 23 | 10 | 11 | 14 | 14,17 | 11 | 9  |
| SAU65 | 14 | 13 | 30 | 23 | 11 | 11 | 12 | 13,19 | 11 | 10 |
| SAU66 | 14 | 13 | 30 | 23 | 11 | 11 | 12 | 13,18 | 11 | 10 |
| SAU67 | 14 | 13 | 30 | 23 | 11 | 11 | 12 | 13,20 | 12 | 10 |
| SAU68 | 14 | 13 | 30 | 24 | 10 | 11 | 13 | 16,17 | 13 | 10 |
| SAU69 | 14 | 13 | 31 | 21 | 10 | 11 | 12 | 13,18 | 11 | 10 |
| SAU70 | 15 | 13 | 30 | 21 | 11 | 11 | 15 | 17,18 | 12 | 11 |
| SAU71 | 13 | 14 | 31 | 21 | 10 | 11 | 13 | 11,12 | 12 | 10 |
| SAU72 | 14 | 13 | 29 | 24 | 10 | 11 | 12 | 18,19 | 13 | 11 |
| SAU73 | 14 | 13 | 30 | 23 | 10 | 11 | 12 | 13,21 | 11 | 10 |
| SAU74 | 14 | 13 | 30 | 23 | 12 | 11 | 12 | 13,19 | 12 | 10 |
| SAU75 | 15 | 13 | 30 | 24 | 10 | 11 | 13 | 18,20 | 12 | 10 |
| SAU76 | 14 | 13 | 32 | 25 | 10 | 11 | 13 | 17,18 | 13 | 10 |
| SAU77 | 14 | 13 | 32 | 25 | 10 | 11 | 13 | 17,19 | 13 | 10 |
| SAU81 | 15 | 13 | 32 | 21 | 11 | 11 | 13 | 16,17 | 11 | 11 |
| SAU82 | 14 | 14 | 32 | 23 | 11 | 11 | 12 | 13,20 | 11 | 10 |
| SAU83 | 15 | 13 | 27 | 24 | 9  | 11 | 12 | 13,16 | 12 | 9  |
| SAU84 | 16 | 13 | 30 | 23 | 10 | 11 | 13 | 13,16 | 12 | 9  |
| SAU85 | 15 | 13 | 30 | 23 | 11 | 11 | 12 | 13,19 | 11 | 10 |
| SAU86 | 15 | 13 | 29 | 24 | 11 | 11 | 13 | 13    | 12 | 9  |
| SAU87 | 14 | 13 | 30 | 23 | 10 | 11 | 12 | 13,19 | 11 | 10 |
| SAU88 | 14 | 12 | 30 | 23 | 10 | 11 | 12 | 13,17 | 11 | 10 |
| SAU89 | 15 | 12 | 29 | 24 | 10 | 11 | 13 | 15    | 12 | 11 |
| SAU91 | 14 | 13 | 30 | 23 | 10 | 11 | 12 | 13,18 | 12 | 10 |

|        |    |    |    |    |    |    |    |       |    |    |
|--------|----|----|----|----|----|----|----|-------|----|----|
| SAU92  | 14 | 13 | 30 | 23 | 11 | 11 | 12 | 13,17 | 11 | 10 |
| SAU93  | 14 | 13 | 30 | 23 | 10 | 11 | 12 | 13,20 | 11 | 10 |
| SAU99  | 15 | 13 | 30 | 26 | 10 | 11 | 13 | 14,18 | 12 | 9  |
| SAU100 | 14 | 13 | 30 | 23 | 10 | 11 | 12 | 12,18 | 11 | 10 |
| SAU105 | 14 | 13 | 30 | 23 | 12 | 11 | 12 | 13,19 | 11 | 10 |
| SAU106 | 14 | 13 | 30 | 23 | 11 | 11 | 12 | 13,19 | 11 | 10 |
| SAU107 | 14 | 13 | 29 | 23 | 10 | 11 | 12 | 13,20 | 12 | 10 |
| SAU108 | 14 | 13 | 30 | 23 | 11 | 11 | 12 | 13,18 | 11 | 10 |
| SAU109 | 14 | 13 | 29 | 23 | 11 | 13 | 13 | 12,17 | 11 | 9  |
| SAU110 | 13 | 13 | 31 | 25 | 10 | 11 | 13 | 15,18 | 12 | 10 |
| SAU111 | 15 | 13 | 29 | 23 | 11 | 11 | 12 | 13,18 | 11 | 10 |
| SAU112 | 14 | 13 | 30 | 23 | 12 | 11 | 12 | 13,21 | 11 | 10 |
| SAU113 | 13 | 13 | 30 | 24 | 10 | 11 | 12 | 15,19 | 11 | 10 |
| SAU114 | 14 | 13 | 31 | 23 | 11 | 11 | 12 | 13,20 | 11 | 10 |
| SAU115 | 14 | 13 | 28 | 23 | 10 | 14 | 13 | 13,16 | 11 | 9  |
| SAU116 | 14 | 13 | 30 | 23 | 11 | 11 | 12 | 13,19 | 11 | 10 |
| SAU117 | 14 | 13 | 30 | 23 | 11 | 11 | 13 | 13,17 | 11 | 10 |
| SAU118 | 14 | 13 | 30 | 23 | 11 | 11 | 12 | 13,18 | 11 | 10 |
| SAU119 | 14 | 13 | 31 | 24 | 10 | 11 | 13 | 16,17 | 12 | 10 |
| SAU120 | 14 | 14 | 31 | 23 | 10 | 11 | 12 | 13,18 | 11 | 10 |
| SAU121 | 17 | 13 | 30 | 21 | 10 | 11 | 15 | 17,19 | 13 | 11 |
| SAU122 | 14 | 13 | 30 | 23 | 11 | 11 | 12 | 13,19 | 11 | 10 |
| SAU123 | 14 | 13 | 30 | 23 | 11 | 11 | 12 | 13,19 | 11 | 10 |

Raw data for Yemen.

| Sample# | DYS19 | DYS389I | DYS389II | DYS390 | DYS391 | DYS392 | DYS393 | DYS385 | DYS439 | DYS438 |
|---------|-------|---------|----------|--------|--------|--------|--------|--------|--------|--------|
| YEM 1   | 14    | 13      | 29       | 23     | 11     | 11     | 12     | 15,16  | 11     | 9      |
| YEM 2   | 13    | 13      | 32       | 23     | 10     | 11     | 13     | 17,17  | 13     | 10     |
| YEM 3   | 14    | 13      | 29       | 22     | 11     | 11     | 12     | 13,17  | 11     | 10     |
| YEM 4   | 14    | 13      | 29       | 22     | 11     | 11     | 12     | 13,18  | 11     | 10     |

|        |    |    |    |    |    |    |    |       |    |    |
|--------|----|----|----|----|----|----|----|-------|----|----|
| YEM 5  | 14 | 13 | 30 | 23 | 10 | 11 | 12 | 13,18 | 11 | 11 |
| YEM 6  | 16 | 13 | 31 | 25 | 10 | 11 | 13 | 11,15 | 10 | 11 |
| YEM 7  | 13 | 13 | 30 | 22 | 11 | 11 | 12 | 13,18 | 12 | 10 |
| YEM 8  | 13 | 12 | 29 | 25 | 10 | 11 | 12 | 12,18 | 12 | 9  |
| YEM 9  | 14 | 13 | 30 | 23 | 11 | 11 | 12 | 13,18 | 11 | 10 |
| YEM 10 | 14 | 13 | 30 | 23 | 10 | 11 | 12 | 13,18 | 11 | 10 |
| YEM 11 | 15 | 12 | 28 | 23 | 10 | 11 | 14 | 14,14 | 11 | 10 |
| YEM 12 | 13 | 13 | 30 | 24 | 10 | 11 | 13 | 15,16 | 13 | 10 |
| YEM 13 | 14 | 13 | 29 | 23 | 11 | 11 | 12 | 13,18 | 12 | 10 |
| YEM 14 | 14 | 13 | 29 | 23 | 10 | 10 | 14 | 12,18 | 10 | 11 |
| YEM 16 | 13 | 13 | 30 | 24 | 10 | 11 | 13 | 16,17 | 12 | 10 |
| YEM 17 | 14 | 13 | 30 | 23 | 10 | 11 | 12 | 13,14 | 12 | 10 |
| YEM 18 | 15 | 13 | 30 | 23 | 10 | 11 | 12 | 14,20 | 11 | 10 |
| YEM 19 | 14 | 13 | 30 | 22 | 11 | 11 | 12 | 13,18 | 12 | 10 |
| YEM 20 | 14 | 13 | 30 | 23 | 10 | 11 | 12 | 13,18 | 11 | 10 |
| YEM 21 | 14 | 13 | 30 | 23 | 11 | 11 | 12 | 14,17 | 11 | 10 |
| YEM 22 | 13 | 13 | 31 | 24 | 10 | 11 | 13 | 16,17 | 11 | 10 |
| YEM 23 | 14 | 13 | 30 | 23 | 11 | 11 | 12 | 13,13 | 11 | 10 |
| YEM 24 | 15 | 12 | 28 | 25 | 9  | 11 | 12 | 17,18 | 12 | 9  |
| YEM 25 | 14 | 13 | 29 | 23 | 10 | 11 | 12 | 14,19 | 11 | 11 |
| YEM 26 | 14 | 13 | 29 | 24 | 11 | 11 | 12 | 12,16 | 11 | 11 |
| YEM 27 | 14 | 13 | 30 | 23 | 11 | 11 | 12 | 13,19 | 11 | 10 |
| YEM 28 | 14 | 13 | 31 | 22 | 11 | 11 | 12 | 13,17 | 11 | 10 |
| YEM 29 | 14 | 13 | 30 | 23 | 10 | 11 | 12 | 13,18 | 12 | 10 |
| YEM 30 | 14 | 13 | 30 | 24 | 11 | 11 | 12 | 12,19 | 12 | 10 |
| YEM 31 | 14 | 13 | 29 | 22 | 10 | 11 | 12 | 13,19 | 11 | 10 |
| YEM 32 | 14 | 14 | 30 | 23 | 11 | 14 | 13 | 12,14 | 12 | 12 |
| YEM 33 | 15 | 12 | 28 | 24 | 10 | 11 | 12 | 17,20 | 10 | 9  |
| YEM 34 | 14 | 13 | 31 | 23 | 10 | 11 | 12 | 13,18 | 12 | 10 |
| YEM 35 | 14 | 12 | 29 | 23 | 11 | 11 | 12 | 12,18 | 11 | 10 |
| YEM 36 | 14 | 13 | 29 | 23 | 11 | 11 | 12 | 13,18 | 12 | 10 |
| YEM 37 | 14 | 13 | 29 | 23 | 10 | 11 | 12 | 14,18 | 11 | 10 |

|        |    |    |    |    |    |    |    |       |    |    |
|--------|----|----|----|----|----|----|----|-------|----|----|
| YEM 38 | 14 | 12 | 30 | 23 | 10 | 12 | 13 | 14,16 | 12 | 10 |
| YEM 40 | 14 | 14 | 30 | 25 | 10 | 11 | 13 | 16,17 | 12 | 10 |
| YEM 41 | 14 | 13 | 29 | 22 | 11 | 11 | 12 | 14,18 | 11 | 10 |
| YEM 42 | 13 | 13 | 30 | 22 | 11 | 11 | 12 | 13,18 | 12 | 10 |
| YEM 43 | 14 | 13 | 29 | 23 | 11 | 11 | 12 | 13,18 | 11 | 10 |
| YEM 44 | 15 | 13 | 30 | 21 | 10 | 11 | 13 | 16,16 | 13 | 11 |
| YEM 45 | 14 | 13 | 30 | 23 | 10 | 11 | 12 | 13,18 | 13 | 10 |
| YEM 46 | 14 | 13 | 30 | 23 | 10 | 11 | 12 | 13,17 | 12 | 10 |
| YEM 47 | 14 | 13 | 30 | 23 | 11 | 11 | 12 | 13,18 | 12 | 10 |
| YEM 48 | 14 | 13 | 30 | 23 | 10 | 11 | 12 | 13,18 | 11 | 10 |
| YEM 49 | 14 | 13 | 29 | 24 | 10 | 11 | 13 | 16,16 | 11 | 10 |
| YEM 50 | 14 | 14 | 31 | 23 | 10 | 11 | 13 | 15,18 | 12 | 10 |
| YEM 51 | 14 | 14 | 30 | 23 | 10 | 11 | 12 | 13,18 | 11 | 10 |
| YEM 52 | 14 | 13 | 29 | 24 | 10 | 11 | 12 | 18,18 | 12 | 10 |
| YEM 53 | 14 | 13 | 30 | 23 | 11 | 11 | 13 | 13,19 | 13 | 10 |
| YEM 54 | 14 | 13 | 29 | 25 | 10 | 11 | 13 | 14,19 | 11 | 11 |
| YEM 55 | 14 | 12 | 29 | 22 | 10 | 11 | 12 | 13,17 | 11 | 10 |
| YEM 56 | 14 | 13 | 30 | 23 | 11 | 11 | 12 | 13,18 | 12 | 10 |
| YEM 57 | 14 | 13 | 29 | 22 | 11 | 11 | 12 | 14,18 | 11 | 10 |
| YEM 58 | 14 | 13 | 29 | 24 | 10 | 11 | 12 | 12,16 | 11 | 10 |
| YEM 59 | 14 | 13 | 28 | 24 | 11 | 14 | 12 | 11,12 | 12 | 12 |
| YEM 60 | 14 | 13 | 29 | 23 | 10 | 11 | 12 | 13,18 | 11 | 10 |
| YEM 61 | 14 | 13 | 29 | 22 | 11 | 11 | 12 | 13,19 | 12 | 10 |
| YEM 62 | 14 | 13 | 30 | 23 | 10 | 11 | 12 | 13,20 | 11 | 10 |
| YEM 63 | 13 | 14 | 31 | 24 | 10 | 11 | 13 | 16,16 | 12 | 10 |
| YEM 64 | 14 | 13 | 29 | 23 | 11 | 11 | 12 | 13,17 | 11 | 10 |
| YEM 65 | 14 | 12 | 28 | 23 | 11 | 11 | 12 | 14,18 | 11 | 10 |
| YEM 66 | 14 | 13 | 30 | 23 | 10 | 11 | 12 | 13,15 | 12 | 10 |
| YEM 67 | 15 | 14 | 30 | 23 | 8  | 11 | 12 | 14,16 | 11 | 10 |
| YEM 68 | 14 | 13 | 29 | 22 | 11 | 11 | 12 | 13,17 | 11 | 10 |
| YEM 69 | 13 | 13 | 31 | 24 | 10 | 11 | 13 | 16,17 | 13 | 10 |
| YEM 70 | 14 | 13 | 29 | 21 | 10 | 11 | 15 | 13,15 | 13 | 11 |

|         |    |    |    |    |    |    |    |       |    |    |
|---------|----|----|----|----|----|----|----|-------|----|----|
| YEM 71  | 14 | 13 | 29 | 22 | 11 | 11 | 12 | 14,18 | 11 | 10 |
| YEM 72  | 14 | 13 | 30 | 23 | 9  | 11 | 12 | 13,18 | 11 | 10 |
| YEM 73  | 13 | 14 | 32 | 25 | 10 | 11 | 13 | 17,17 | 12 | 10 |
| YEM 74  | 14 | 13 | 30 | 22 | 11 | 11 | 12 | 13,18 | 12 | 10 |
| YEM 75  | 14 | 13 | 30 | 23 | 11 | 11 | 13 | 13,19 | 11 | 10 |
| YEM 76  | 14 | 12 | 29 | 23 | 8  | 11 | 12 | 13,15 | 12 | 9  |
| YEM 77  | 14 | 13 | 30 | 23 | 11 | 11 | 12 | 13,18 | 12 | 10 |
| YEM 78  | 14 | 14 | 30 | 24 | 10 | 11 | 12 | 12,19 | 12 | 10 |
| YEM 79  | 14 | 14 | 30 | 24 | 10 | 11 | 12 | 18,18 | 12 | 10 |
| YEM 80  | 14 | 13 | 29 | 25 | 10 | 11 | 12 | 12,18 | 11 | 10 |
| YEM 81  | 14 | 13 | 28 | 24 | 11 | 14 | 13 | 11,14 | 12 | 12 |
| YEM 82  | 14 | 13 | 30 | 22 | 11 | 11 | 12 | 13,18 | 11 | 10 |
| YEM 83  | 14 | 13 | 28 | 24 | 10 | 14 | 12 | 12,14 | 11 | 12 |
| YEM 84  | 14 | 13 | 30 | 24 | 10 | 11 | 12 | 12,18 | 12 | 10 |
| YEM 85  | 14 | 14 | 30 | 23 | 8  | 11 | 12 | 14,17 | 11 | 9  |
| YEM 86  | 14 | 13 | 30 | 23 | 10 | 11 | 12 | 13,18 | 12 | 10 |
| YEM 87  | 14 | 13 | 29 | 24 | 10 | 11 | 12 | 19,20 | 12 | 10 |
| YEM 88  | 14 | 13 | 29 | 23 | 10 | 11 | 12 | 13,15 | 11 | 10 |
| YEM 89  | 14 | 13 | 31 | 23 | 10 | 11 | 12 | 12,15 | 12 | 10 |
| YEM 90  | 13 | 13 | 30 | 22 | 11 | 11 | 12 | 13,18 | 12 | 10 |
| YEM 91  | 14 | 13 | 29 | 25 | 10 | 11 | 13 | 16,17 | 11 | 9  |
| YEM 92  | 13 | 13 | 32 | 23 | 10 | 11 | 13 | 17,17 | 13 | 10 |
| YEM 93  | 14 | 13 | 30 | 23 | 11 | 11 | 12 | 13,17 | 11 | 10 |
| YEM 94  | 14 | 13 | 30 | 23 | 11 | 11 | 12 | 13,18 | 11 | 10 |
| YEM 95  | 13 | 12 | 29 | 25 | 10 | 11 | 12 | 12,18 | 12 | 9  |
| YEM 96  | 14 | 13 | 29 | 22 | 11 | 11 | 12 | 13,18 | 11 | 10 |
| YEM 97  | 14 | 13 | 29 | 23 | 11 | 11 | 12 | 15,16 | 11 | 9  |
| YEM 98  | 14 | 13 | 29 | 22 | 12 | 11 | 12 | 13,17 | 11 | 10 |
| YEM 99  | 14 | 13 | 30 | 23 | 11 | 11 | 12 | 13,18 | 12 | 10 |
| YEM 100 | 14 | 14 | 31 | 23 | 10 | 11 | 12 | 13,18 | 11 | 10 |
| YEM 101 | 14 | 15 | 32 | 22 | 11 | 11 | 12 | 13,18 | 11 | 10 |
| YEM 102 | 14 | 13 | 30 | 23 | 10 | 11 | 12 | 13,18 | 11 | 10 |

|         |    |    |    |    |      |    |    |       |       |    |
|---------|----|----|----|----|------|----|----|-------|-------|----|
| YEM 103 | 14 | 13 | 29 | 23 | 11   | 11 | 12 | 13,17 | 11    | 10 |
| YEM 104 | 13 | 13 | 30 | 21 | 9,11 | 11 | 13 | 12,15 | 11,13 | 10 |
| YEM 105 | 14 | 13 | 30 | 23 | 10   | 11 | 12 | 13,18 | 11    | 10 |
| YEM 106 | 14 | 13 | 30 | 23 | 10   | 11 | 12 | 13,18 | 12    | 10 |

Raw data for Dubai.

| Sample# | DYS19 | DYS389I | DYS389II | DYS390 | DYS391 | DYS392 | DYS393 | DYS385 | DYS439 | DYS438 |
|---------|-------|---------|----------|--------|--------|--------|--------|--------|--------|--------|
| DUB1    | 14    | 13      | 30       | 24     | 10     | 11     | 12     | 13,15  | 11     | 9      |
| DUB2    | 12    | 13      | 30       | 25     | 10     | 11     | 13     | 18,18  | 13     | 10     |
| DUB3    | 14    | 13      | 29       | 22     | 10     | 11     | 12     | 14,16  | 13     | 10     |
| DUB4    | 13    | 13      | 30       | 23     | 9      | 11     | 14     | 16,17  | 12     | 10     |
| DUB5    | 14    | 13      | 30       | 23     | 9      | 11     | 12     | 14,16  | 12     | 9      |
| DUB6    | 14    | 13      | 30       | 23     | 11     | 11     | 12     | 13,19  | 13     | 10     |
| DUB7    | 14    | 13      | 31       | 23     | 11     | 11     | 12     | 13,19  | 11     | 10     |
| DUB8    | 15    | 13      | 31       | 21     | 11     | 11     | 13     | 17,17  | 11     | 11     |
| DUB9    | 14    | 13      | 30       | 23     | 11     | 11     | 13     | 13,17  | 11     | 10     |
| DUB10   | 14    | 13      | 30       | 23     | 11     | 11     | 12     | 13,19  | 11     | 10     |
| DUB11   | 17    | 13      | 31       | 25     | 10     | 11     | 15     | 11,15  | 10     | 11     |
| DUB12   | 14    | 13      | 30       | 23     | 10     | 11     | 12     | 13,18  | 12     | 10     |
| DUB13   | 14    | 14      | 30       | 23     | 10     | 10     | 14     | 13,18  | 10     | 11     |
| DUB14   | 14    | 12      | 28       | 25     | 11     | 11     | 13     | 14,19  | 11     | 11     |
| DUB15   | 14    | 13      | 29       | 24     | 10     | 10     | 14     | 13,17  | 11     | 11     |
| DUB16   | 17    | 12      | 30       | 25     | 10     | 11     | 13     | 11,11  | 12     | 10     |
| DUB17   | 14    | 13      | 29       | 21     | 10     | 11     | 15     | 13,15  | 12     | 10     |
| DUB18   | 14    | 12      | 29       | 23     | 11     | 12     | 13     | 14,16  | 13     | 10     |
| DUB19   | 16    | 13      | 30       | 21     | 10     | 11     | 14     | 17,17  | 10     | 11     |
| DUB20   | 11    | 13      | 30       | 24     | 10     | 12     | 13     | 16,19  | 11     | 11     |
| DUB21   | 16    | 12      | 28       | 23     | 9      | 11     | 12     | 15,18  | 12     | 10     |
| DUB22   | 14    | 13      | 29       | 23     | 9      | 11     | 12     | 13,16  | 11     | 9      |
| DUB23   | 14    | 12      | 27       | 25     | 10     | 11     | 14     | 11,12  | 12     | 10     |
| DUB24   | 14    | 12      | 25       | 23     | 11     | 14     | 11     | 13,18  | 12     | 11     |

|       |       |    |    |    |    |    |    |       |    |    |
|-------|-------|----|----|----|----|----|----|-------|----|----|
| DUB25 | 14    | 13 | 29 | 22 | 10 | 11 | 12 | 15,16 | 12 | 10 |
| DUB26 | 14    | 13 | 30 | 24 | 10 | 10 | 13 | 17,18 | 12 | 10 |
| DUB27 | 15    | 13 | 29 | 24 | 10 | 11 | 13 | 13,17 | 12 | 9  |
| DUB28 | 14    | 13 | 30 | 23 | 10 | 11 | 12 | 13,18 | 11 | 10 |
| DUB29 | 14    | 13 | 29 | 23 | 11 | 11 | 12 | 13,18 | 11 | 10 |
| DUB30 | 14    | 13 | 29 | 22 | 10 | 11 | 12 | 14,16 | 12 | 10 |
| DUB31 | 14    | 12 | 28 | 25 | 10 | 11 | 13 | 14,20 | 11 | 11 |
| DUB32 | 14    | 12 | 29 | 22 | 10 | 12 | 12 | 14,17 | 12 | 10 |
| DUB33 | 14    | 14 | 30 | 24 | 10 | 11 | 12 | 13,21 | 13 | 10 |
| DUB34 | 14    | 11 | 27 | 22 | 10 | 14 | 11 | 13,17 | 12 | 10 |
| DUB35 | 15    | 13 | 30 | 21 | 10 | 11 | 13 | 15,18 | 12 | 11 |
| DUB36 | 14    | 14 | 31 | 23 | 10 | 13 | 13 | 14,16 | 11 | 9  |
| DUB37 | 15    | 13 | 29 | 24 | 10 | 11 | 12 | 16,16 | 12 | 9  |
| DUB38 | 14    | 13 | 30 | 24 | 10 | 11 | 13 | 17,18 | 12 | 10 |
| DUB39 | 15    | 13 | 31 | 21 | 10 | 11 | 13 | 17,18 | 12 | 11 |
| DUB40 | 14    | 14 | 31 | 23 | 10 | 11 | 12 | 13,16 | 12 | 9  |
| DUB41 | 14    | 12 | 28 | 22 | 10 | 10 | 11 | 13,18 | 12 | 10 |
| DUB42 | 14    | 13 | 30 | 23 | 11 | 11 | 12 | 13,20 | 11 | 10 |
| DUB43 | 15    | 14 | 32 | 24 | 10 | 11 | 13 | 11,11 | 11 | 10 |
| DUB44 | 14,15 | 12 | 30 | 23 | 12 | 11 | 14 | 13,14 | 11 | 10 |
| DUB45 | 13    | 13 | 29 | 23 | 10 | 11 | 13 | 14,16 | 11 | 9  |
| DUB46 | 14    | 12 | 28 | 23 | 10 | 12 | 13 | 12,19 | 11 | 9  |
| DUB47 | 14    | 11 | 27 | 22 | 10 | 12 | 13 | 11,13 | 11 | 10 |
| DUB48 | 15    | 13 | 29 | 22 | 10 | 11 | 13 | 15,18 | 12 | 9  |
| DUB49 | 14    | 13 | 31 | 24 | 10 | 11 | 13 | 10,11 | 10 | 11 |
| DUB50 | 15    | 11 | 28 | 24 | 11 | 11 | 15 | 11,11 | 12 | 11 |
| DUB51 | 14    | 13 | 30 | 24 | 10 | 13 | 13 | 14,16 | 10 | 9  |
| DUB52 | 14    | 13 | 30 | 23 | 12 | 11 | 13 | 13,19 | 11 | 10 |
| DUB53 | 13    | 13 | 30 | 24 | 11 | 12 | 15 | 15,15 | 11 | 10 |
| DUB54 | 13    | 13 | 31 | 25 | 10 | 11 | 13 | 16,17 | 11 | 10 |
| DUB55 | 14    | 14 | 30 | 24 | 10 | 11 | 12 | 16,16 | 12 | 9  |
| DUB56 | 16    | 12 | 28 | 23 | 10 | 10 | 14 | 13,21 | 10 | 11 |

|       |    |    |    |    |    |    |    |       |    |    |
|-------|----|----|----|----|----|----|----|-------|----|----|
| DUB57 | 14 | 13 | 30 | 23 | 10 | 13 | 13 | 14,16 | 12 | 9  |
| DUB58 | 15 | 13 | 32 | 24 | 10 | 11 | 13 | 11,16 | 13 | 10 |
| DUB59 | 14 | 12 | 28 | 23 | 10 | 14 | 12 | 12,22 | 12 | 11 |
| DUB60 | 15 | 13 | 29 | 21 | 10 | 11 | 15 | 17,18 | 11 | 11 |
| DUB61 | 15 | 13 | 30 | 23 | 11 | 11 | 12 | 14,21 | 11 | 10 |
| DUB62 | 14 | 13 | 30 | 23 | 10 | 13 | 13 | 14,16 | 11 | 9  |
| DUB63 | 16 | 13 | 32 | 24 | 10 | 11 | 13 | 11,11 | 13 | 10 |
| DUB64 | 14 | 13 | 30 | 23 | 11 | 11 | 12 | 13,19 | 11 | 10 |
| DUB65 | 14 | 14 | 31 | 24 | 10 | 11 | 13 | 17,18 | 12 | 10 |
| DUB66 | 15 | 13 | 29 | 23 | 10 | 10 | 14 | 13,18 | 12 | 11 |
| DUB67 | 15 | 13 | 30 | 23 | 9  | 13 | 13 | 15,16 | 11 | 9  |
| DUB68 | 14 | 13 | 30 | 23 | 11 | 11 | 12 | 13,19 | 11 | 10 |
| DUB69 | 16 | 13 | 30 | 21 | 10 | 11 | 15 | 18,18 | 12 | 11 |
| DUB70 | 17 | 13 | 30 | 21 | 10 | 11 | 14 | 17,18 | 12 | 11 |
| DUB71 | 16 | 12 | 28 | 21 | 10 | 11 | 14 | 13,15 | 11 | 10 |
| DUB72 | 16 | 14 | 31 | 25 | 10 | 11 | 13 | 11,14 | 9  | 11 |
| DUB73 | 14 | 13 | 30 | 23 | 11 | 11 | 12 | 13,19 | 11 | 10 |
| DUB74 | 15 | 13 | 30 | 23 | 11 | 11 | 12 | 14,19 | 11 | 10 |
| DUB75 | 15 | 13 | 30 | 21 | 10 | 11 | 13 | 15,18 | 12 | 11 |
| DUB76 | 15 | 14 | 32 | 23 | 10 | 10 | 13 | 14,14 | 11 | 11 |
| DUB77 | 14 | 14 | 30 | 23 | 10 | 11 | 12 | 13,19 | 12 | 11 |
| DUB78 | 14 | 13 | 30 | 23 | 10 | 12 | 12 | 13,19 | 12 | 9  |
| DUB79 | 14 | 14 | 30 | 24 | 10 | 11 | 12 | 16,16 | 12 | 9  |
| DUB80 | 14 | 14 | 30 | 24 | 11 | 13 | 12 | 11,14 | 12 | 11 |
| DUB81 | 14 | 14 | 30 | 23 | 10 | 11 | 12 | 14,20 | 11 | 9  |
| DUB82 | 16 | 13 | 30 | 24 | 11 | 11 | 13 | 12,14 | 10 | 11 |
| DUB83 | 15 | 13 | 32 | 21 | 10 | 11 | 13 | 17,18 | 12 | 11 |
| DUB84 | 15 | 12 | 29 | 21 | 10 | 11 | 14 | 14,14 | 11 | 10 |
| DUB85 | 14 | 13 | 30 | 23 | 10 | 11 | 12 | 13,20 | 11 | 10 |
| DUB86 | 15 | 13 | 29 | 24 | 10 | 11 | 12 | 13,18 | 13 | 9  |
| DUB87 | 15 | 13 | 30 | 23 | 11 | 11 | 12 | 13,19 | 11 | 10 |
| DUB88 | 14 | 13 | 30 | 23 | 10 | 10 | 14 | 13,16 | 10 | 11 |

|        |    |    |    |    |    |    |    |       |    |    |
|--------|----|----|----|----|----|----|----|-------|----|----|
| DUB89  | 14 | 14 | 32 | 23 | 10 | 13 | 13 | 14,16 | 11 | 9  |
| DUB90  | 14 | 13 | 30 | 23 | 10 | 11 | 12 | 13,18 | 11 | 10 |
| DUB91  | 15 | 14 | 31 | 24 | 10 | 11 | 13 | 11,14 | 10 | 11 |
| DUB92  | 16 | 14 | 32 | 25 | 11 | 11 | 13 | 11,15 | 10 | 11 |
| DUB93  | 13 | 13 | 30 | 24 | 10 | 11 | 13 | 16,17 | 12 | 11 |
| DUB94  | 14 | 12 | 28 | 22 | 10 | 15 | 11 | 13,18 | 11 | 10 |
| DUB95  | 15 | 13 | 30 | 25 | 10 | 11 | 13 | 11,14 | 10 | 11 |
| DUB96  | 16 | 14 | 30 | 23 | 10 | 10 | 15 | 13,18 | 11 | 11 |
| DUB97  | 15 | 13 | 29 | 25 | 11 | 11 | 13 | 11,14 | 10 | 11 |
| DUB98  | 14 | 13 | 29 | 23 | 10 | 11 | 12 | 13,20 | 11 | 10 |
| DUB99  | 14 | 13 | 31 | 22 | 10 | 11 | 12 | 13,14 | 10 | 9  |
| DUB100 | 16 | 13 | 30 | 25 | 10 | 12 | 13 | 10,14 | 10 | 11 |
| DUB101 | 14 | 13 | 31 | 23 | 11 | 11 | 12 | 13,18 | 11 | 10 |
| DUB102 | 14 | 13 | 30 | 23 | 10 | 11 | 12 | 13,19 | 11 | 10 |
| DUB103 | 14 | 12 | 28 | 24 | 10 | 11 | 13 | 13,17 | 12 | 9  |
| DUB104 | 14 | 14 | 30 | 23 | 10 | 13 | 13 | 14,16 | 10 | 9  |
| DUB105 | 16 | 13 | 31 | 24 | 11 | 11 | 13 | 11,14 | 10 | 11 |
| DUB106 | 14 | 13 | 30 | 23 | 11 | 11 | 12 | 13,20 | 11 | 10 |
| DUB107 | 16 | 13 | 31 | 24 | 11 | 11 | 13 | 11,14 | 10 | 11 |
| DUB108 | 16 | 13 | 30 | 24 | 11 | 11 | 13 | 12,14 | 10 | 11 |
| DUB109 | 14 | 13 | 30 | 23 | 10 | 11 | 12 | 13,16 | 10 | 9  |
| DUB110 | 15 | 13 | 29 | 24 | 11 | 13 | 12 | 11,14 | 12 | 12 |
| DUB111 | 17 | 13 | 30 | 25 | 10 | 11 | 13 | 11,15 | 10 | 11 |
| DUB112 | 14 | 13 | 29 | 23 | 10 | 11 | 12 | 13,16 | 11 | 9  |
| DUB113 | 13 | 13 | 30 | 24 | 10 | 11 | 13 | 16,18 | 12 | 10 |
| DUB114 | 14 | 12 | 29 | 23 | 10 | 14 | 12 | 14,19 | 11 | 11 |
| DUB115 | 14 | 13 | 30 | 23 | 11 | 11 | 12 | 13,19 | 11 | 10 |
| DUB116 | 15 | 14 | 30 | 24 | 11 | 13 | 13 | 14,15 | 13 | 13 |
| DUB117 | 16 | 13 | 29 | 26 | 11 | 11 | 13 | 11,14 | 10 | 11 |
| DUB118 | 14 | 13 | 30 | 24 | 10 | 11 | 13 | 17,18 | 12 | 10 |
| DUB119 | 14 | 13 | 29 | 24 | 10 | 10 | 15 | 14,17 | 9  | 11 |
| DUB120 | 14 | 13 | 31 | 24 | 10 | 11 | 12 | 14,17 | 11 | 10 |

|        |    |    |    |    |    |    |    |          |    |    |
|--------|----|----|----|----|----|----|----|----------|----|----|
| DUB121 | 14 | 13 | 30 | 23 | 11 | 11 | 12 | 13,21    | 11 | 10 |
| DUB122 | 14 | 13 | 30 | 23 | 11 | 11 | 12 | 13,19    | 11 | 10 |
| DUB123 | 14 | 13 | 29 | 23 | 10 | 11 | 12 | 13,20    | 11 | 10 |
| DUB124 | 14 | 13 | 30 | 23 | 11 | 11 | 13 | 13,19    | 11 | 10 |
| DUB125 | 15 | 13 | 30 | 23 | 11 | 11 | 12 | 13,19    | 11 | 10 |
| DUB126 | 14 | 13 | 30 | 23 | 11 | 11 | 12 | 13,19    | 11 | 10 |
| DUB127 | 15 | 13 | 29 | 25 | 10 | 11 | 13 | 11,14    | 10 | 11 |
| DUB128 | 16 | 13 | 30 | 23 | 10 | 13 | 13 | 12,12    | 12 | 11 |
| DUB129 | 15 | 14 | 31 | 21 | 10 | 11 | 14 | 15,18    | 13 | 11 |
| DUB130 | 15 | 13 | 30 | 25 | 11 | 11 | 13 | 11,14    | 11 | 11 |
| DUB131 | 14 | 13 | 30 | 23 | 12 | 11 | 12 | 13,18    | 11 | 10 |
| DUB132 | 15 | 13 | 30 | 24 | 10 | 11 | 13 | 14,16    | 12 | 10 |
| DUB133 | 13 | 13 | 29 | 22 | 10 | 15 | 13 | 14,17    | 11 | 11 |
| DUB134 | 14 | 13 | 31 | 23 | 10 | 11 | 12 | 13,15    | 12 | 10 |
| DUB135 | 14 | 13 | 29 | 23 | 10 | 11 | 12 | 12,17    | 13 | 9  |
| DUB136 | 16 | 12 | 28 | 21 | 10 | 11 | 16 | 16,16    | 13 | 11 |
| DUB137 | 14 | 13 | 29 | 23 | 11 | 11 | 12 | 13,19    | 11 | 10 |
| DUB138 | 15 | 13 | 29 | 24 | 10 | 11 | 13 | 18,18    | 12 | 10 |
| DUB139 | 15 | 13 | 31 | 24 | 10 | 11 | 13 | 10,11    | 12 | 10 |
| DUB140 | 15 | 13 | 30 | 25 | 10 | 11 | 13 | 14,16    | 12 | 10 |
| DUB141 | 15 | 13 | 29 | 23 | 10 | 11 | 13 | 14,16    | 10 | 9  |
| DUB142 | 14 | 14 | 32 | 25 | 10 | 11 | 14 | 18,21    | 12 | 10 |
| DUB143 | 16 | 14 | 30 | 23 | 10 | 11 | 14 | 11,12,13 | 13 | 10 |
| DUB144 | 15 | 12 | 29 | 23 | 10 | 12 | 13 | 13,15    | 12 | 10 |
| DUB145 | 14 | 13 | 30 | 23 | 11 | 11 | 12 | 13,18    | 12 | 10 |
| DUB146 | 15 | 13 | 29 | 23 | 11 | 15 | 13 | 15,16    | 11 | 9  |
| DUB147 | 16 | 12 | 29 | 24 | 10 | 11 | 13 | 12,16    | 10 | 11 |
| DUB148 | 18 | 12 | 28 | 24 | 11 | 11 | 12 | 12,17    | 13 | 9  |
| DUB149 | 14 | 12 | 28 | 22 | 11 | 14 | 11 | 13,15    | 13 | 10 |
| DUB150 | 14 | 13 | 30 | 23 | 11 | 11 | 12 | 13,19    | 11 | 10 |
| DUB151 | 17 | 12 | 28 | 24 | 11 | 11 | 12 | 12,17    | 13 | 9  |
| DUB152 | 16 | 13 | 30 | 21 | 10 | 11 | 15 | 17,18    | 12 | 11 |

|        |    |    |    |    |    |    |    |       |    |    |
|--------|----|----|----|----|----|----|----|-------|----|----|
| DUB153 | 15 | 13 | 30 | 25 | 11 | 11 | 13 | 12,14 | 10 | 11 |
| DUB154 | 15 | 12 | 28 | 22 | 10 | 11 | 11 | 14,18 | 13 | 9  |
| DUB155 | 14 | 13 | 30 | 23 | 11 | 11 | 12 | 13,19 | 12 | 10 |
| DUB156 | 14 | 13 | 30 | 23 | 10 | 12 | 12 | 13,19 | 12 | 9  |
| DUB157 | 14 | 13 | 30 | 23 | 11 | 10 | 12 | 13,19 | 11 | 10 |
| DUB158 | 14 | 13 | 28 | 23 | 10 | 14 | 12 | 11,14 | 14 | 12 |
| DUB159 | 15 | 12 | 31 | 22 | 10 | 11 | 14 | 12,15 | 12 | 10 |
| DUB160 | 16 | 13 | 31 | 24 | 10 | 11 | 13 | 11,15 | 10 | 11 |
| DUB161 | 16 | 13 | 30 | 22 | 10 | 11 | 15 | 17,18 | 13 | 11 |
| DUB162 | 16 | 13 | 30 | 21 | 10 | 11 | 15 | 16,19 | 12 | 11 |
| DUB163 | 14 | 13 | 29 | 23 | 11 | 14 | 12 | 11,13 | 11 | 12 |
| DUB164 | 15 | 13 | 31 | 25 | 11 | 11 | 13 | 11,14 | 10 | 9  |
| DUB165 | 14 | 13 | 30 | 23 | 11 | 11 | 12 | 13,20 | 11 | 10 |
| DUB166 | 16 | 12 | 30 | 25 | 11 | 11 | 13 | 11,14 | 10 | 11 |
| DUB167 | 15 | 13 | 29 | 22 | 10 | 11 | 13 | 13,14 | 12 | 10 |
| DUB168 | 13 | 14 | 31 | 24 | 10 | 11 | 14 | 16,16 | 13 | 10 |
| DUB169 | 13 | 13 | 30 | 23 | 10 | 11 | 12 | 13,19 | 11 | 10 |
| DUB170 | 14 | 13 | 29 | 23 | 10 | 11 | 12 | 12,17 | 13 | 9  |
| DUB171 | 17 | 14 | 30 | 23 | 10 | 10 | 14 | 13,13 | 12 | 11 |
| DUB172 | 15 | 13 | 29 | 23 | 10 | 11 | 12 | 13,18 | 12 | 9  |
| DUB173 | 17 | 13 | 30 | 21 | 10 | 11 | 15 | 16,18 | 12 | 11 |
| DUB174 | 14 | 13 | 29 | 23 | 10 | 11 | 12 | 13,19 | 11 | 10 |
| DUB175 | 15 | 12 | 28 | 22 | 10 | 14 | 12 | 9,18  | 8  | 10 |
| DUB176 | 15 | 13 | 30 | 23 | 11 | 11 | 12 | 13,19 | 11 | 10 |
| DUB177 | 15 | 14 | 32 | 24 | 11 | 11 | 13 | 11,14 | 10 | 11 |
| DUB178 | 14 | 12 | 28 | 22 | 10 | 14 | 11 | 13,17 | 12 | 10 |
| DUB179 | 16 | 14 | 30 | 21 | 11 | 11 | 14 | 16,18 | 11 | 11 |
| DUB180 | 16 | 13 | 30 | 23 | 11 | 11 | 12 | 12,17 | 12 | 10 |
| DUB181 | 15 | 13 | 28 | 23 | 10 | 13 | 13 | 13,16 | 12 | 9  |
| DUB182 | 14 | 13 | 29 | 23 | 10 | 11 | 12 | 13,16 | 11 | 9  |
| DUB183 | 15 | 14 | 31 | 24 | 10 | 11 | 13 | 11,14 | 10 | 11 |
| DUB184 | 15 | 13 | 30 | 24 | 10 | 11 | 13 | 14,15 | 11 | 9  |

|        |    |    |    |    |    |    |    |       |    |    |
|--------|----|----|----|----|----|----|----|-------|----|----|
| DUB185 | 14 | 13 | 30 | 23 | 11 | 11 | 12 | 13,19 | 11 | 10 |
| DUB186 | 14 | 13 | 30 | 24 | 10 | 11 | 12 | 13,17 | 12 | 10 |
| DUB187 | 17 | 13 | 30 | 21 | 10 | 11 | 14 | 17,19 | 12 | 11 |
| DUB188 | 14 | 13 | 30 | 24 | 10 | 11 | 13 | 17,18 | 12 | 10 |
| DUB189 | 15 | 14 | 31 | 21 | 10 | 11 | 15 | 15,18 | 12 | 11 |
| DUB190 | 14 | 13 | 30 | 23 | 11 | 11 | 12 | 13,19 | 11 | 10 |
| DUB191 | 15 | 13 | 31 | 24 | 10 | 11 | 13 | 11,15 | 10 | 12 |
| DUB192 | 13 | 14 | 30 | 22 | 10 | 15 | 13 | 12,14 | 11 | 11 |
| DUB193 | 14 | 14 | 30 | 24 | 10 | 11 | 12 | 12,20 | 12 | 10 |
| DUB194 | 16 | 14 | 32 | 25 | 11 | 11 | 13 | 11,13 | 11 | 11 |
| DUB195 | 13 | 13 | 30 | 25 | 10 | 11 | 13 | 16,17 | 11 | 10 |
| DUB196 | 14 | 13 | 29 | 22 | 10 | 11 | 13 | 14,19 | 11 | 9  |
| DUB197 | 15 | 13 | 31 | 24 | 10 | 11 | 13 | 11,15 | 10 | 11 |
| DUB198 | 14 | 13 | 30 | 23 | 10 | 13 | 12 | 13,18 | 13 | 10 |
| DUB199 | 16 | 13 | 30 | 25 | 10 | 12 | 13 | 11,14 | 10 | 11 |
| DUB200 | 14 | 12 | 28 | 24 | 11 | 11 | 13 | 14,20 | 11 | 11 |
| DUB201 | 15 | 14 | 31 | 25 | 11 | 11 | 13 | 11,15 | 10 | 11 |
| DUB202 | 14 | 13 | 29 | 23 | 11 | 13 | 12 | 12,14 | 14 | 12 |
| DUB203 | 14 | 12 | 28 | 22 | 10 | 14 | 11 | 13,17 | 14 | 10 |
| DUB204 | 15 | 13 | 30 | 24 | 10 | 11 | 13 | 14,16 | 12 | 10 |
| DUB205 | 16 | 12 | 29 | 25 | 11 | 11 | 12 | 11,14 | 11 | 11 |
| DUB206 | 15 | 13 | 30 | 25 | 12 | 11 | 13 | 11,14 | 10 | 11 |
| DUB207 | 15 | 13 | 29 | 23 | 10 | 10 | 14 | 13,18 | 12 | 11 |
| DUB208 | 14 | 13 | 29 | 23 | 10 | 11 | 12 | 13,18 | 11 | 10 |
| DUB209 | 15 | 13 | 30 | 21 | 10 | 11 | 14 | 15,19 | 13 | 11 |
| DUB210 | 13 | 13 | 28 | 22 | 10 | 15 | 13 | 14,16 | 12 | 11 |
| DUB211 | 14 | 13 | 30 | 23 | 11 | 11 | 12 | 13,20 | 11 | 10 |
| DUB212 | 15 | 13 | 31 | 24 | 10 | 11 | 13 | 11,14 | 10 | 11 |
| DUB213 | 14 | 12 | 27 | 24 | 11 | 14 | 12 | 11,15 | 12 | 12 |
| DUB214 | 14 | 14 | 31 | 24 | 10 | 11 | 13 | 17,18 | 12 | 10 |
| DUB215 | 14 | 12 | 27 | 25 | 11 | 13 | 13 | 16,17 | 12 | 9  |
| DUB216 | 15 | 13 | 30 | 23 | 10 | 11 | 13 | 14,15 | 13 | 10 |

|        |    |    |    |    |    |    |    |       |    |    |
|--------|----|----|----|----|----|----|----|-------|----|----|
| DUB217 | 14 | 13 | 30 | 23 | 11 | 11 | 12 | 13,19 | 11 | 10 |
|--------|----|----|----|----|----|----|----|-------|----|----|

Raw data for Iran.

| Sample# | DYS19 | DYS389I | DYS389II | DYS390 | DYS391 | DYS392 | DYS393 | DYS385 | DYS439 | DYS438 |
|---------|-------|---------|----------|--------|--------|--------|--------|--------|--------|--------|
| IRA01   | 15    | 13      | 30       | 21     | 10     | 11     | 12     | 13,13  | 12     | 9      |
| IRA02   | 14    | 12      | 28       | 24     | 10     | 11     | 9,12   | 14,17  | 10     | 10     |
| IRA03   | 15    | 13      | 30       | 24     | 10     | 12     | 13     | 14,16  | 11     | 10     |
| IRA04   | 16    | 13      | 32       | 25     | 10     | 11     | 13     | 10,14  | 11     | 11     |
| IRA05   | 16    | 14      | 32       | 26     | 11     | 11     | 13     | 11,14  | 10     | 11     |
| IRA06   | 14    | 13      | 30       | 24     | 10     | 11     | 12     | 13,15  | 12     | 9      |
| IRA07   | 14    | 13      | 31       | 23     | 11     | 11     | 12     | 13,19  | 11     | 10     |
| IRA08   | 15    | 13      | 29       | 23     | 11     | 11     | 12     | 15,17  | 12     | 9      |
| IRA09   | 16    | 12      | 31       | 23     | 10     | 11     | 14     | 15,17  | 11     | 11     |
| IRA10   | 14    | 13      | 30       | 24     | 10     | 11     | 12     | 13,16  | 12     | 9      |
| IRA11   | 15    | 13      | 29       | 24     | 11     | 13     | 12     | 12,14  | 12     | 12     |
| IRA12   | 14    | 13      | 29       | 24     | 10     | 11     | 13     | 15,15  | 11     | 9      |
| IRA13   | 14    | 14      | 31       | 23     | 11     | 11     | 12     | 13,19  | 11     | 10     |
| IRA14   | 14    | 13      | 30       | 25     | 11     | 11     | 12     | 11,14  | 10     | 11     |
| IRA15   | 14    | 14      | 30       | 25     | 10     | 11     | 12     | 11,15  | 10     | 11     |
| IRA16   | 15    | 13      | 30       | 23     | 10     | 11     | 14     | 17,18  | 11     | 10     |
| IRA17   | 15    | 12      | 28       | 20     | 10     | 11     | 14     | 13,14  | 13     | 10     |
| IRA18   | 13    | 14      | 32       | 24     | 10     | 11     | 13     | 16,18  | 12     | 10     |
| IRA19   | 16    | 13      | 30       | 24     | 10     | 11     | 13     | 11,14  | 11     | 11     |
| IRA20   | 16    | 14      | 31       | 24     | 11     | 11     | 13     | 11,14  | 10     | 11     |
| IRA21   | 16    | 13      | 29       | 24     | 10     | 11     | 14     | 16,18  | 13     | 10     |
| IRA22   | 14    | 13      | 29       | 23     | 10     | 11     | 12     | 13,16  | 12     | 9      |
| IRA23   | 14    | 14      | 30       | 25     | 10     | 15     | 15     | 11,15  | 13     | 10     |
| IRA24   | 15    | 14      | 30       | 25     | 10     | 15     | 15     | 11,15  | 13     | 10     |
| IRA25   | 14    | 13      | 29       | 24     | 11     | 13     | 12     | 11,15  | 12     | 12     |
| IRA26   | 13    | 13      | 32       | 24     | 10     | 11     | 13     | 17,18  | 12     | 10     |
| IRA27   | 14    | 12      | 28       | 22     | 10     | 14     | 11     | 13,18  | 12     | 10     |

|       |    |    |    |    |    |    |    |       |    |    |
|-------|----|----|----|----|----|----|----|-------|----|----|
| IRA28 | 15 | 12 | 28 | 23 | 10 | 11 | 12 | 13,16 | 11 | 9  |
| IRA29 | 15 | 13 | 30 | 25 | 11 | 11 | 13 | 11,14 | 10 | 11 |
| IRA30 | 15 | 14 | 30 | 24 | 10 | 11 | 13 | 11,14 | 10 | 11 |
| IRA31 | 14 | 13 | 29 | 24 | 9  | 11 | 12 | 13,16 | 13 | 10 |
| IRA32 | 15 | 13 | 29 | 22 | 9  | 11 | 14 | 13,18 | 11 | 10 |
| IRA33 | 15 | 13 | 29 | 23 | 9  | 11 | 12 | 13,16 | 12 | 9  |
| IRA34 | 13 | 13 | 30 | 23 | 9  | 11 | 14 | 16,18 | 13 | 10 |
| IRA35 | 15 | 13 | 31 | 25 | 10 | 11 | 13 | 11,14 | 10 | 11 |
| IRA36 | 14 | 13 | 30 | 24 | 11 | 13 | 12 | 11,15 | 11 | 12 |
| IRA37 | 15 | 13 | 31 | 22 | 10 | 11 | 15 | 15,15 | 11 | 10 |
| IRA38 | 16 | 13 | 29 | 27 | 11 | 11 | 13 | 11,14 | 10 | 11 |
| IRA39 | 17 | 13 | 30 | 21 | 10 | 11 | 14 | 17,18 | 12 | 11 |
| IRA40 | 15 | 14 | 32 | 21 | 10 | 11 | 13 | 16,19 | 13 | 11 |
| IRA41 | 14 | 14 | 31 | 23 | 11 | 11 | 12 | 13,19 | 11 | 10 |
| IRA42 | 15 | 13 | 29 | 23 | 10 | 14 | 13 | 14,16 | 11 | 10 |
| IRA43 | 14 | 14 | 30 | 23 | 10 | 14 | 13 | 15,16 | 12 | 9  |
| IRA44 | 14 | 13 | 29 | 23 | 10 | 10 | 14 | 13,17 | 12 | 11 |
| IRA45 | 14 | 14 | 30 | 24 | 10 | 13 | 12 | 11,13 | 12 | 11 |
| IRA46 | 13 | 14 | 30 | 23 | 10 | 13 | 13 | 16,16 | 11 | 9  |
| IRA47 | 15 | 13 | 30 | 21 | 10 | 11 | 14 | 13,17 | 12 | 11 |
| IRA48 | 15 | 13 | 30 | 24 | 10 | 11 | 13 | 11,15 | 10 | 11 |
| IRA49 | 16 | 14 | 30 | 24 | 11 | 15 | 11 | 12,16 | 11 | 10 |
| IRA50 | 16 | 13 | 30 | 25 | 10 | 11 | 13 | 11,14 | 10 | 11 |
| IRA51 | 15 | 14 | 31 | 25 | 10 | 11 | 13 | 11,15 | 10 | 9  |
| IRA52 | 15 | 13 | 31 | 25 | 10 | 11 | 13 | 11,14 | 11 | 11 |
| IRA53 | 14 | 14 | 31 | 23 | 12 | 11 | 12 | 13,19 | 11 | 10 |
| IRA54 | 16 | 13 | 32 | 26 | 11 | 11 | 13 | 11,14 | 11 | 11 |
| IRA55 | 16 | 13 | 29 | 25 | 10 | 11 | 13 | 11,14 | 10 | 11 |
| IRA56 | 14 | 13 | 30 | 23 | 10 | 11 | 12 | 13,21 | 11 | 10 |
| IRA57 | 15 | 13 | 29 | 23 | 9  | 11 | 12 | 13,16 | 11 | 9  |
| IRA58 | 16 | 13 | 31 | 23 | 11 | 11 | 13 | 14,17 | 10 | 10 |
| IRA59 | 13 | 13 | 29 | 23 | 10 | 16 | 13 | 13,16 | 13 | 11 |

|       |    |    |    |    |    |    |    |       |    |    |
|-------|----|----|----|----|----|----|----|-------|----|----|
| IRA60 | 15 | 14 | 32 | 23 | 10 | 11 | 13 | 11,14 | 10 | 11 |
| IRA61 | 14 | 13 | 29 | 24 | 10 | 11 | 13 | 15,15 | 11 | 9  |
| IRA62 | 14 | 13 | 30 | 23 | 11 | 11 | 12 | 13,19 | 11 | 10 |
| IRA63 | 14 | 13 | 30 | 23 | 11 | 11 | 12 | 13,19 | 11 | 10 |
| IRA64 | 15 | 14 | 30 | 24 | 10 | 13 | 13 | 12,12 | 11 | 11 |
| IRA65 | 16 | 13 | 31 | 25 | 10 | 11 | 13 | 11,14 | 10 | 11 |
| IRA66 | 14 | 13 | 30 | 23 | 11 | 11 | 12 | 13,19 | 11 | 10 |
| IRA67 | 15 | 13 | 29 | 25 | 10 | 13 | 13 | 12,15 | 12 | 11 |
| IRA68 | 13 | 13 | 30 | 25 | 11 | 11 | 14 | 15,16 | 12 | 10 |
| IRA69 | 15 | 13 | 28 | 19 | 8  | 11 | 14 | 14,15 | 10 | 10 |
| IRA70 | 13 | 12 | 30 | 23 | 9  | 11 | 13 | 16,18 | 11 | 10 |
| IRA71 | 15 | 13 | 32 | 21 | 10 | 11 | 13 | 17,17 | 12 | 11 |
| IRA72 | 14 | 12 | 25 | 23 | 10 | 11 | 12 | 15,15 | 13 | 9  |
| IRA73 | 14 | 14 | 31 | 23 | 10 | 13 | 13 | 14,16 | 11 | 9  |
| IRA74 | 14 | 13 | 30 | 23 | 10 | 11 | 12 | 16,18 | 11 | 10 |
| IRA75 | 13 | 13 | 32 | 23 | 10 | 13 | 12 | 15,15 | 11 | 9  |
| IRA76 | 14 | 13 | 28 | 23 | 11 | 14 | 12 | 11,14 | 13 | 12 |
| IRA77 | 14 | 12 | 29 | 23 | 10 | 11 | 14 | 13,13 | 11 | 10 |
| IRA78 | 14 | 13 | 29 | 24 | 10 | 10 | 13 | 12,20 | 11 | 11 |
| IRA79 | 14 | 13 | 28 | 22 | 9  | 13 | 13 | 15,17 | 11 | 9  |
| IRA80 | 13 | 13 | 30 | 24 | 9  | 11 | 14 | 16,17 | 13 | 10 |
| IRA81 | 12 | 13 | 30 | 24 | 10 | 11 | 13 | 18,19 | 12 | 10 |
| IRA82 | 14 | 14 | 30 | 23 | 10 | 11 | 12 | 14,21 | 12 | 9  |
| IRA83 | 16 | 13 | 31 | 26 | 11 | 11 | 14 | 11,14 | 10 | 11 |
| IRA84 | 14 | 13 | 29 | 23 | 11 | 11 | 12 | 13,17 | 11 | 9  |
| IRA85 | 14 | 12 | 28 | 23 | 10 | 11 | 12 | 15,16 | 12 | 9  |
| IRA86 | 17 | 12 | 28 | 22 | 11 | 13 | 12 | 11,20 | 11 | 9  |
| IRA87 | 14 | 12 | 28 | 21 | 10 | 11 | 14 | 12,14 | 14 | 10 |
| IRA88 | 14 | 13 | 30 | 22 | 10 | 11 | 12 | 12,15 | 11 | 9  |
| IRA89 | 16 | 13 | 30 | 24 | 11 | 11 | 13 | 11,14 | 10 | 11 |
| IRA90 | 16 | 15 | 32 | 25 | 11 | 11 | 13 | 10,13 | 10 | 11 |
| IRA91 | 15 | 14 | 31 | 21 | 10 | 11 | 13 | 15,17 | 12 | 12 |

|        |    |    |    |    |    |    |    |       |    |    |
|--------|----|----|----|----|----|----|----|-------|----|----|
| IRA92  | 15 | 14 | 31 | 23 | 10 | 10 | 15 | 13,19 | 11 | 11 |
| IRA93  | 15 | 13 | 29 | 23 | 9  | 11 | 12 | 13,16 | 12 | 9  |
| IRA94  | 14 | 13 | 29 | 24 | 11 | 13 | 12 | 11,13 | 12 | 12 |
| IRA95  | 14 | 13 | 30 | 23 | 11 | 11 | 12 | 13,19 | 11 | 10 |
| IRA96  | 17 | 14 | 29 | 22 | 10 | 11 | 13 | 17,17 | 11 | 10 |
| IRA97  | 14 | 14 | 31 | 23 | 11 | 11 | 12 | 13,20 | 11 | 10 |
| IRA98  | 14 | 12 | 27 | 22 | 10 | 14 | 11 | 13,17 | 11 | 10 |
| IRA99  | 15 | 14 | 31 | 21 | 10 | 11 | 14 | 16,19 | 13 | 11 |
| IRA100 | 14 | 13 | 29 | 22 | 10 | 11 | 12 | 14,15 | 11 | 9  |
| IRA101 | 16 | 13 | 30 | 24 | 11 | 11 | 13 | 11,14 | 10 | 11 |
| IRA102 | 16 | 13 | 30 | 21 | 10 | 11 | 14 | 17,18 | 13 | 11 |
| IRA103 | 14 | 14 | 31 | 23 | 10 | 11 | 12 | 14,21 | 11 | 10 |
| IRA104 | 14 | 13 | 29 | 24 | 10 | 13 | 13 | 11,14 | 12 | 12 |
